# Supplementary material for: Indenothiophene-based asymmetric small molecules for organic solar cells
Source: Royal Society of Chemistry journal article supplement (doi:10.1039/c7ra01902e), 2017-01-01
Supplement: c7ra01902e1.pdf [file c7ra01902e1.pdf]

## Electronic Supplementary Information

### Indenothiophene-Based Asymmetric Small Molecules for Organic Solar Cells

Qi Shang,<sup>a, b, †</sup> Meng Wang,<sup>b, †</sup> Jiajun Wei,<sup>b, c</sup> and Qingdong Zheng<sup>b, \*</sup>

<sup>a</sup> College of Chemistry, Fuzhou University, Fuzhou, 350108, P. R. China.

<sup>b</sup> State Key Laboratory of Structural Chemistry, Fujian Institute of Research on the Structure of Matter, Chinese Academy of Sciences, Fuzhou, 350002, P. R. China. E-mail: [qingdongzheng@fjirsm.ac.cn](mailto:qingdongzheng@fjirsm.ac.cn)

<sup>c</sup> University of Chinese Academy of Sciences, 19 Yuquan Road, Beijing, 100049, P. R. China.

\*To whom correspondence should be addressed.

† These authors contributed equally to this work.

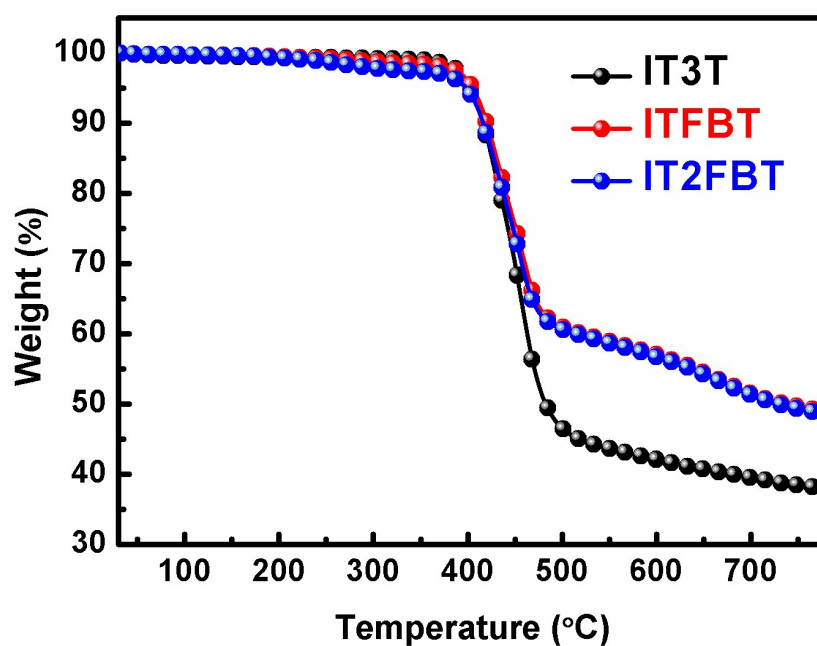

**Fig. S1** TGA curves of IT3T, ITFBT and IT2FBT with a heating rate of 10 °C/min under nitrogen.

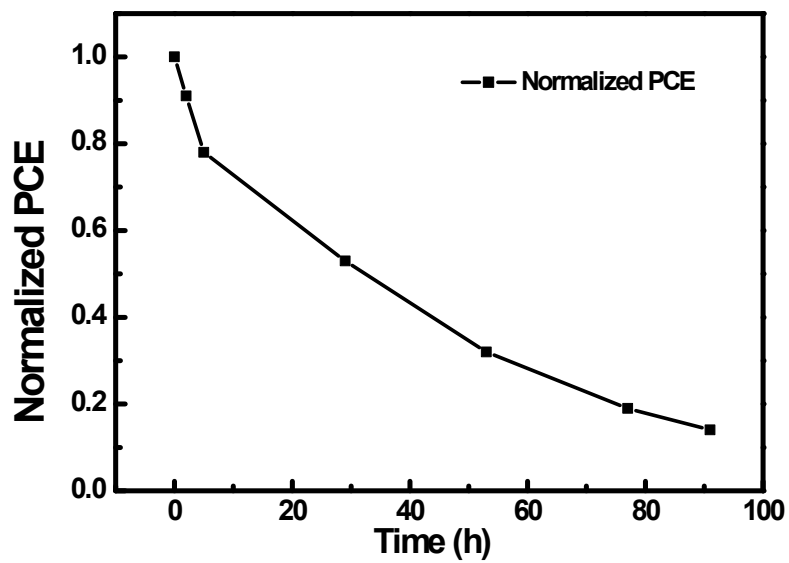

**Fig. S2** Normalized device stability of ITFBT:PC<sub>71</sub>BM stored under ambient conditions with an initial PCE of 4.48%.

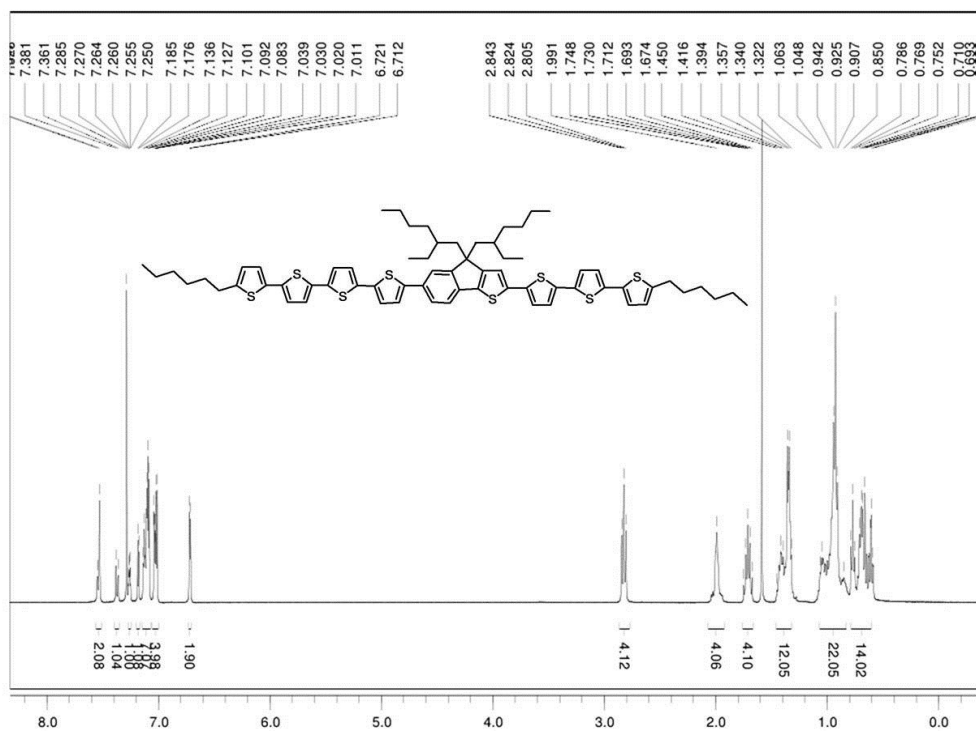

**Fig. S3** <sup>1</sup>H NMR spectrum of IT3T in CDCl<sub>3</sub>.

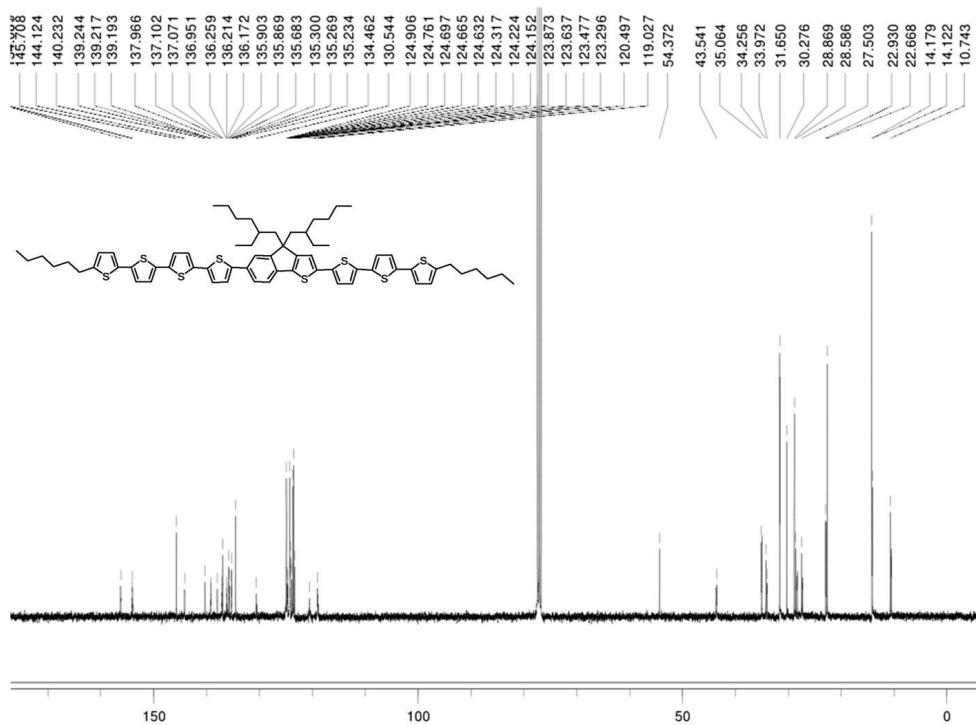

**Fig. S4**  $^{13}\text{C}$  NMR spectrum of IT3T in  $\text{CDCl}_3$ .

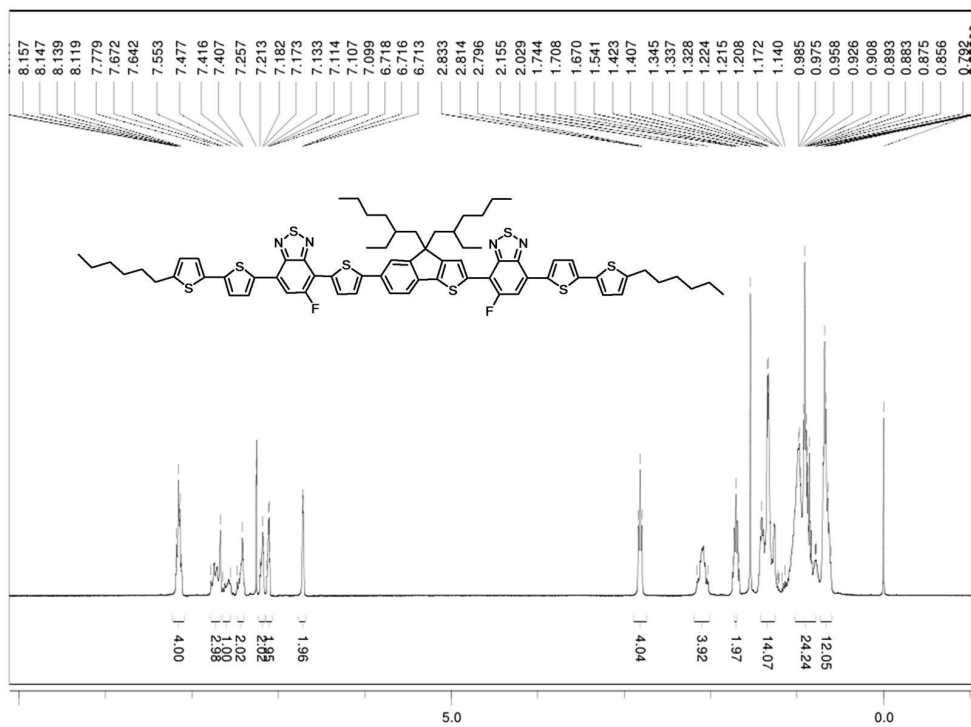

**Fig. S5**  $^1\text{H}$  NMR spectrum of ITFBT in  $\text{CDCl}_3$ .

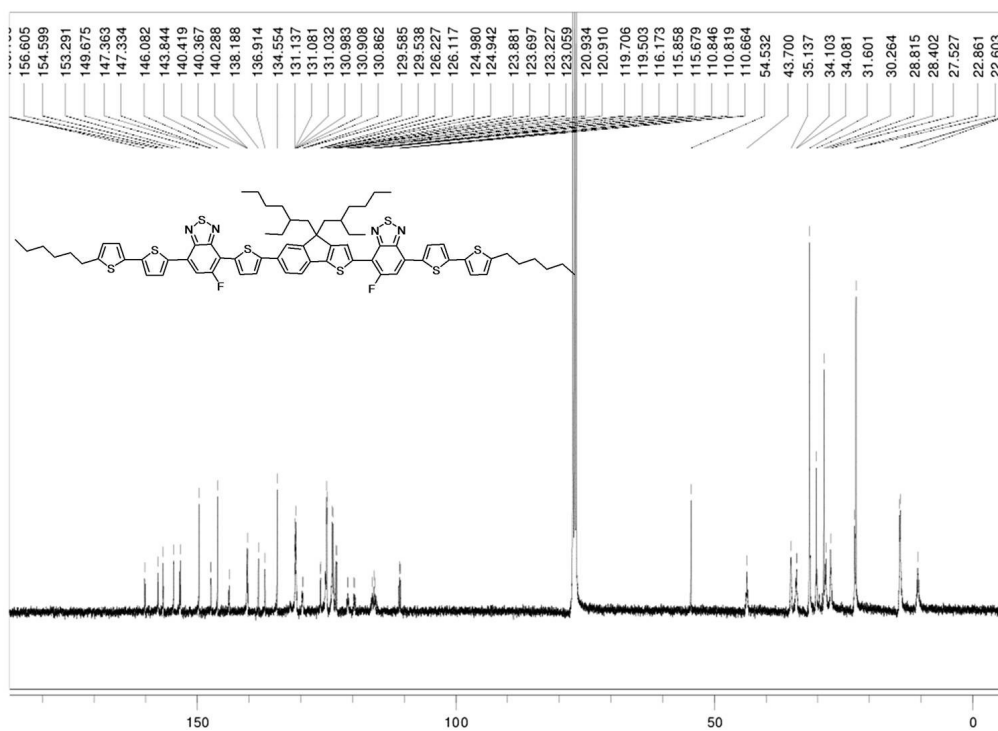

Fig. S6  $^{13}\text{C}$  NMR spectrum of ITFBT in  $\text{CDCl}_3$ .

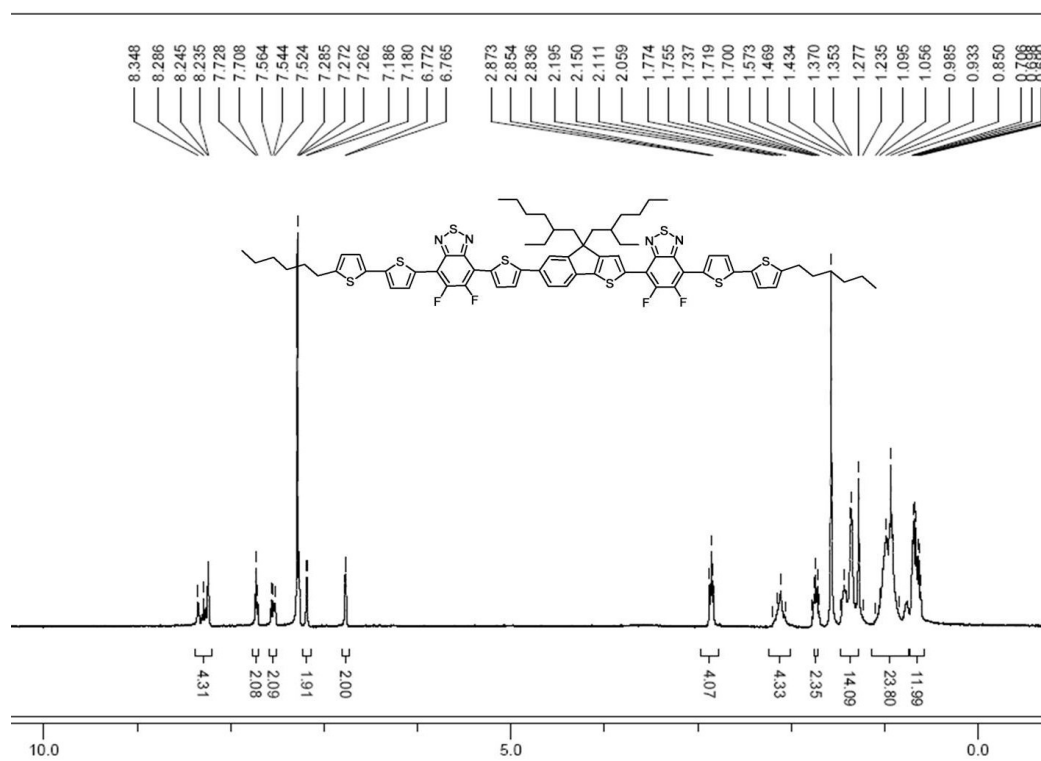

Fig. S7  $^1\text{H}$  NMR spectrum of IT2FBT in  $\text{CDCl}_3$ .

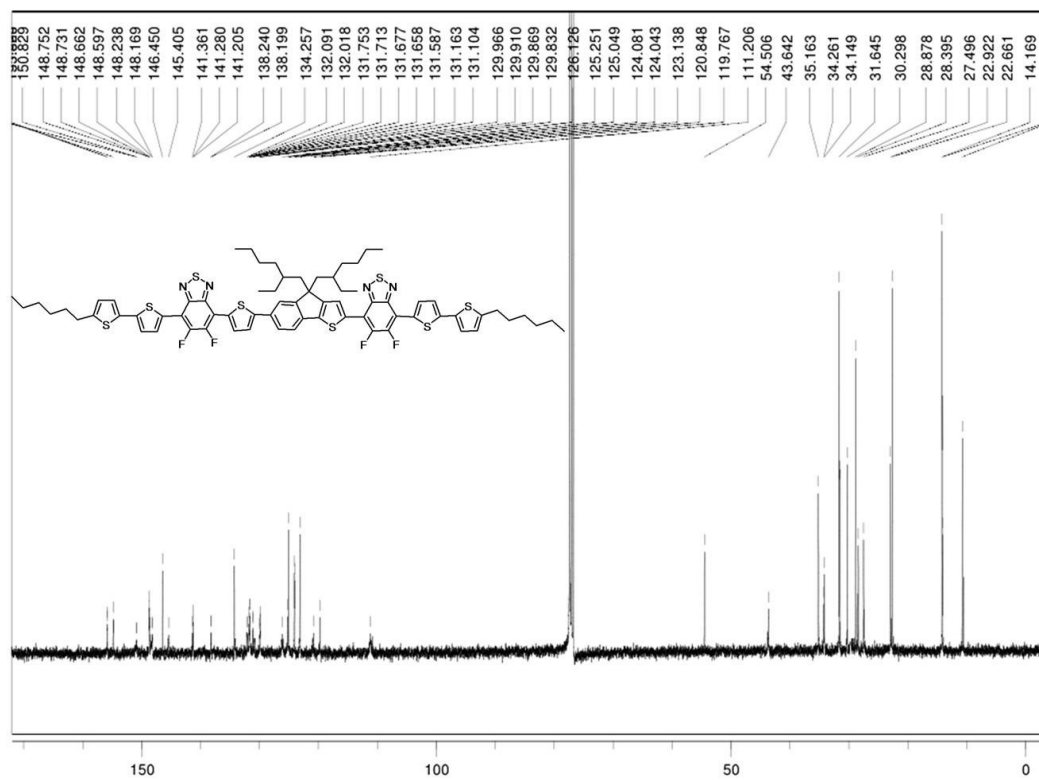

**Fig. S8**  $^{13}\text{C}$  NMR spectrum of IT2FBT in  $\text{CDCl}_3$ .
